# Supplementary material for: Safety, Stability, and Therapeutic Efficacy of Long-Circulating TQ-Incorporated Liposomes: Implication in the Treatment of Lung Cancer
Source: MDPI journal article supplement (doi:10.3390/pharmaceutics14010153), 2022-01-09
Supplement: s1 [file s1]

# Supplementary Materials: Safety, Stability and Therapeutic Efficacy of Long-Circulating TQ-Incorporated Liposomes: Implication in the Treatment of Lung Cancer

Arif Khan, Mohammed A. Alsahli, Mohammad A. Aljasir, Hamzah Maswadeh, Mugahid A. Mobark, Faizul Azam, Khaled S. Allemailem, Faris Alrumaihi, Fahad A. Alhumaydhi, Ameen S. S. Alwashmi, Ahmed A. Almatroudi, Mahdi H. Alsugoor and Masood A. Khan

**Table S1.** AutoDock 4.2 results of TQ with several anticancer drug targets.

| S.N. | Targets                             | PDB Code | Binding Energy of TQ in kcal/mol |
|------|-------------------------------------|----------|----------------------------------|
| 1    | Matrix Metalloproteinase-2 (MMP-2)  | 1HOV     | -5.34                            |
| 2    | Chk1                                | 2R0U     | -3.05                            |
| 3    | Cyclin A                            | 6GUE     | -5.61                            |
| 4    | Apoptosis regulator Bcl-2           | 4LXD     | -4.64                            |
| 5    | Src kinase                          | 2BDF     | -2.66                            |
| 6    | phosphatidylinositol-3 kinase alpha | 3ZIM     | -5.82                            |
| 7    | Heat Shock Protein 90 (Hsp90)       | 4BQG     | -6.05                            |
| 8    | JAK2                                | 3KCK     | -4.28                            |
| 9    | Caspase 3                           | 1RE1     | -1.19                            |
| 10   | EGFR                                | 1M17     | -1.99                            |
| 11   | GTPase HRas                         | 6BVM     | -3.77                            |
| 12   | VEGFR2 kinase                       | 4AG8     | -5.41                            |

**Table S2.** Effect of free TQ on general appearance and behavioral observations in Phase-1 oral acute toxicity assay in Swiss albino mice.

|                     | TQ 0 | TQ 10 | TQ 100 | TQ 1000 |
|---------------------|------|-------|--------|---------|
| Skin and fur        | NO   | NO    | PIL    | PIL     |
| Eyes                | NO   | NO    | BOE    | BOE     |
| Mucous membrane     | NO   | NO    | NO     | NO      |
| Behavioral patterns | NO   | NO    | Ab     | Ab      |
| Salivation          | NO   | NO    | NO     | NO      |
| Lethargy/Sleep      | NO   | NO    | Ab     | Ab      |
| Diarrhea            | NO   | NO    | NO     | NO      |
| Mortality           | 0/3  | 0/3   | 2/3    | 3/3     |

**Abbreviations:** Not observed (NO); Abnormality detected (Ab); Piloerection (PIL); Blinking of eyes (BOE)

**Table S3.** Effect of free TQ on general appearance and behavioural observations in Phase-2 oral acute toxicity assay in Swiss albino mice.

| Observations        | TQ 0 | TQ 20 | TQ 40 | TQ 80 | TQ 100 | TQ 160 |
|---------------------|------|-------|-------|-------|--------|--------|
| Skin and fur        | NO   | NO    | NO    | NO    | PIL    | PIL    |
| Eyes                | NO   | NO    | NO    | BOE   | BOE    | BOE    |
| Mucous membrane     | NO   | NO    | NO    | NO    | NO     | NO     |
| Behavioral patterns | NO   | NO    | NO    | NO    | Ab     | Ab     |
| Salivation          | NO   | NO    | NO    | NO    | NO     | NO     |
| Lethargy/Sleep      | NO   | NO    | NO    | Ab    | Ab     | Ab     |

|           |     |     |     |     |     |     |
|-----------|-----|-----|-----|-----|-----|-----|
| Diarrhea  | NO  | NO  | NO  | NO  | NO  | NO  |
| Mortality | 0/3 | 0/3 | 0/3 | 0/3 | 2/3 | 2/3 |

**Table S4.** Effect of PEG-Lip-TQ on general appearance and behavioural observations in Phase-1 oral acute toxicity assay in Swiss albino mice.

| Observations        | PEG-Lip-TQ 0 | PEG-Lip-TQ 10 | PEG-Lip-TQ 100 | PEG-Lip-TQ 1000 |
|---------------------|--------------|---------------|----------------|-----------------|
| Skin and fur        | NO           | NO            | NO             | PIL             |
| Eyes                | NO           | NO            | NO             | BOE             |
| Mucous membrane     | NO           | NO            | NO             | NO              |
| Behavioral patterns | NO           | NO            | NO             | Ab              |
| Salivation          | NO           | NO            | NO             | NO              |
| Lethargy/Sleep      | NO           | NO            | NO             | Ab              |
| Diarrhea            | NO           | NO            | NO             | NO              |
| Mortality           | 0/3          | 0/3           | 0/3            | 1/3             |

**Table S5.** Effect of PEG-Lip-TQ on general appearance and behavioural observations in Phase-2 oral acute toxicity assay in Swiss albino mice.

| Observations        | PEG-Lip-TQ 0 | PEG-Lip-TQ 600 | PEG-Lip-TQ 1000 | PEG-Lip-TQ 1600 | PEG-Lip-TQ 2900 |
|---------------------|--------------|----------------|-----------------|-----------------|-----------------|
| Skin and fur        | NO           | PIL            | PIL             | PIL             | NO              |
| Eyes                | NO           | BOE            | BOE             | BOE             | BOE             |
| Mucous membrane     | NO           | NO             | NO              | NO              | NO              |
| Behavioral patterns | NO           | NO             | Ab              | Ab              | Ab              |
| Salivation          | NO           | NO             | NO              | NO              | NO              |
| Lethargy/Sleep      | NO           | NO             | Ab              | Ab              | Ab              |
| Diarrhea            | NO           | NO             | NO              | NO              | NO              |
| Mortality           | 0/3          | 0/3            | 0/3             | 3/3             | 3/3             |

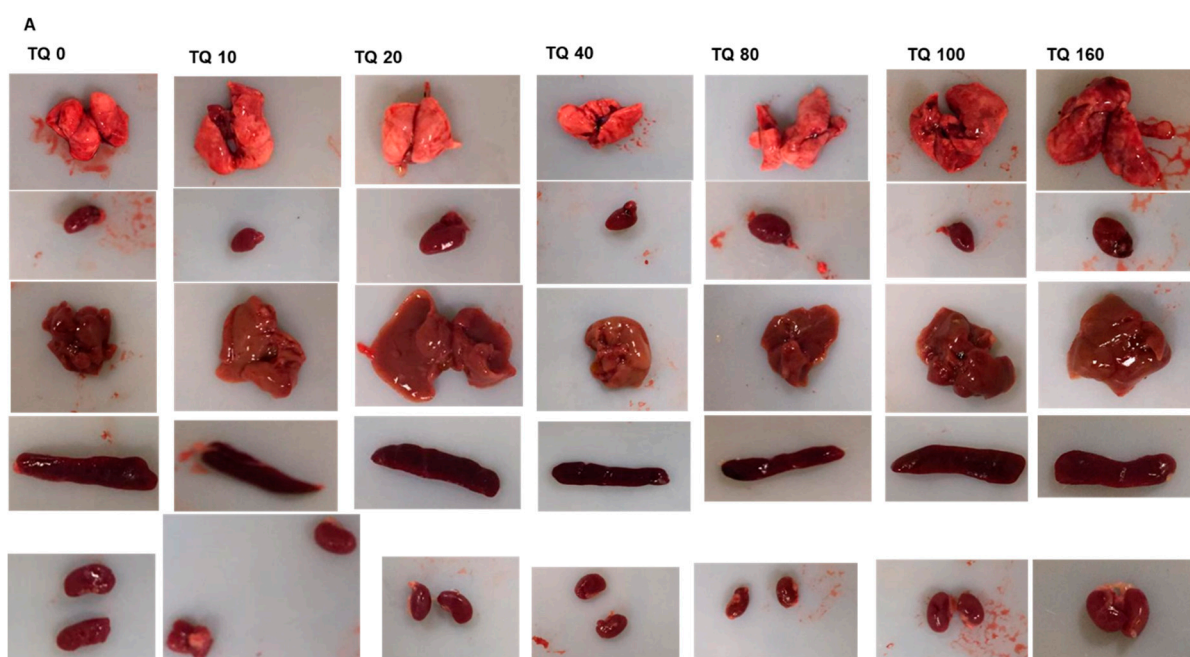

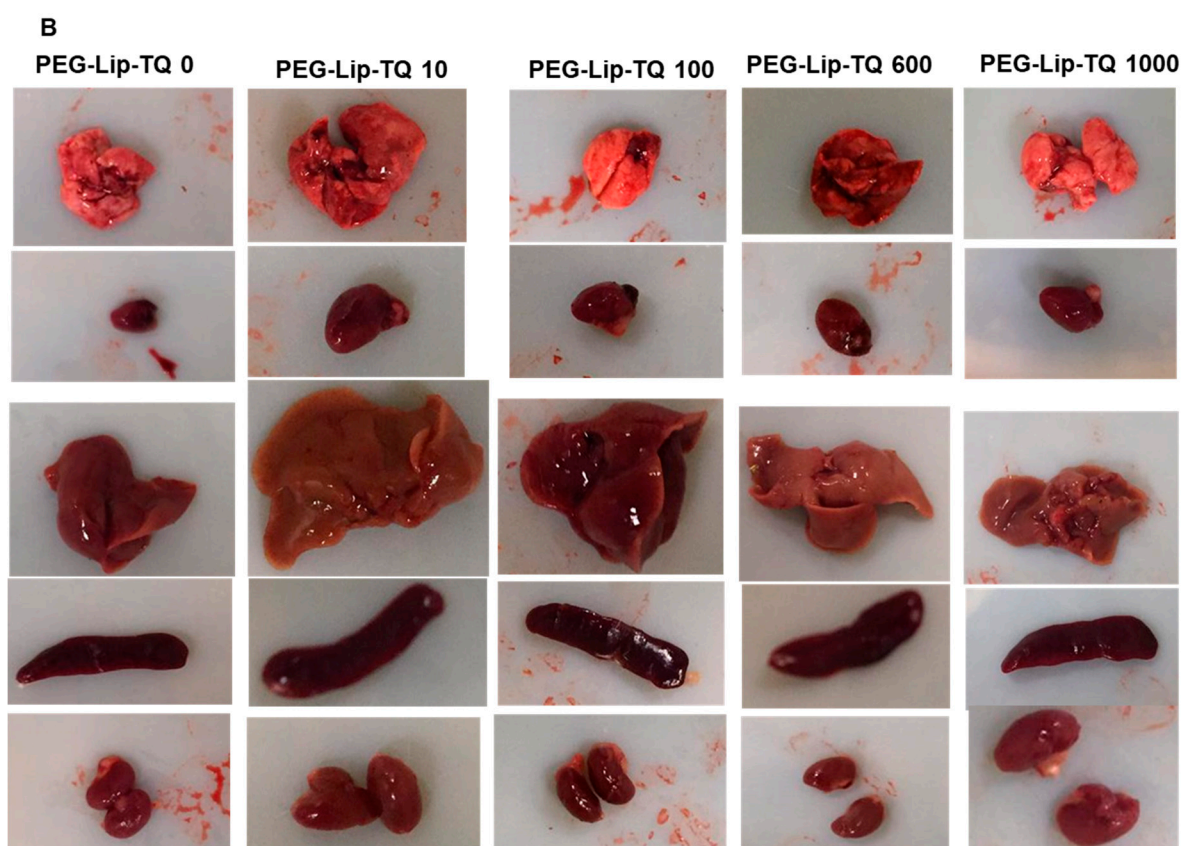

**Figure S1.** Effect of TQ on relative organ weight (ROW) of vital organs (lungs, heart, liver, spleen and kidneys) in all the surviving animals from phase-1 and phase-2. The representing images of vital organs from the animals exposed to (A) Free TQ (B) PEG-Lip-TQ.
